# Supplementary material for: Effect of Laccase-Mediated Biopolymer Grafting on Kraft Pulp Fibers for Enhancing Paper’s Mechanical Properties
Source: PubMed Central journal article supplement (PMC6418782; doi:10.3390/polym9110570), 2017-11-02
Supplement: polymers-09-00570-s001.pdf [file polymers-09-00570-s001.pdf]

## Supplementary Materials: Effect of Laccase-Mediated Biopolymer Grafting on Kraft Pulp Fibers for Enhancing Paper's Mechanical Properties

Lourdes Ballinas-Casarrubias, Luis Villanueva-Solí, Carlos Espinoza-Hicks, Alejandro Camacho-Dávila, Hilda Amelia Piñón Castillo, Samuel B. Pérez, Eduardo Duarte Villa 2, Miguel de Dios Hernández and Guillermo González-Sánchez

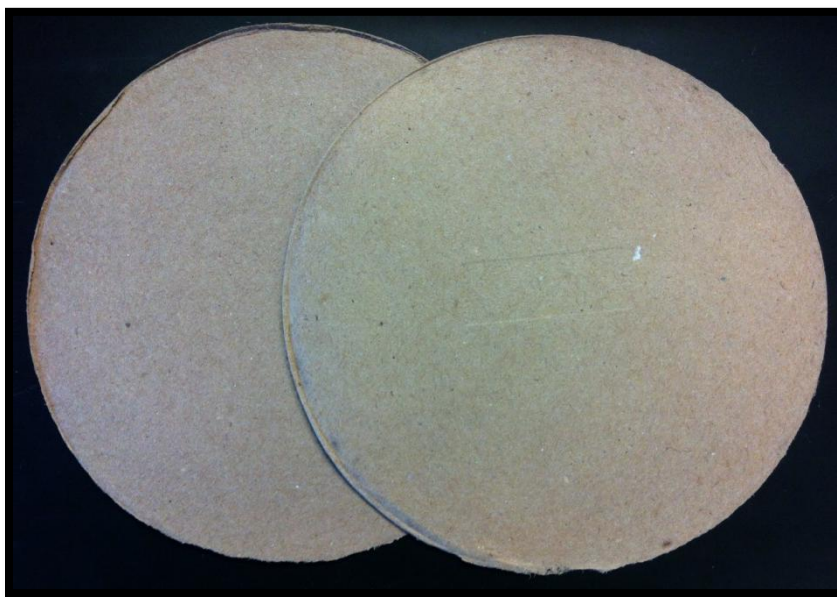

**Figure S1.** A) Paper with no treatment. (left) B) Paper treated with Lacasse, Gallic acid, CPX, and CMC (right).
